# Supplementary figures and images for: Small wards in the ICU: a favorable measure for controlling the transmission of carbapenem-resistant Klebsiella pneumoniae
Source: PubMed Central journal article supplement — Intensive Care Med. 2022 Sep 21;48(11):1573–81. doi: 10.1007/s00134-022-06881-0 (PMC9592670; doi:10.1007/s00134-022-06881-0), 2022-09-21

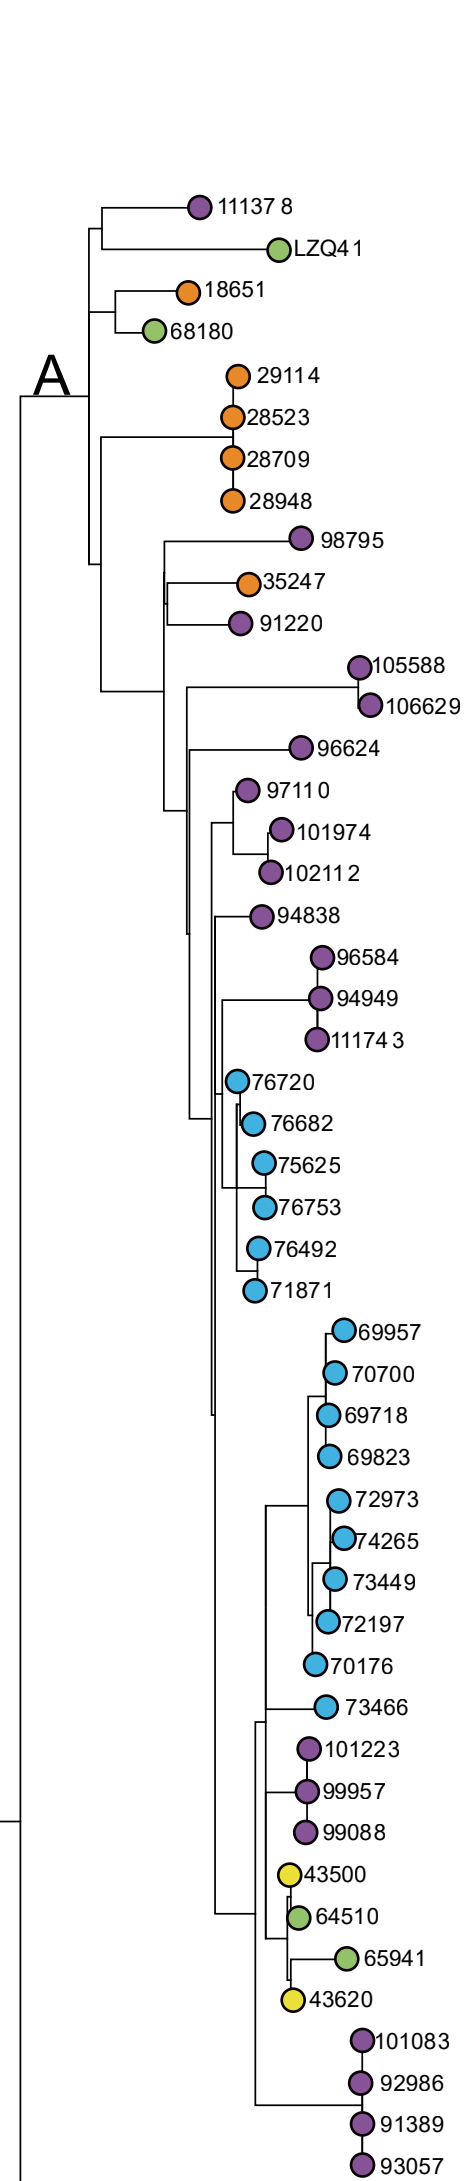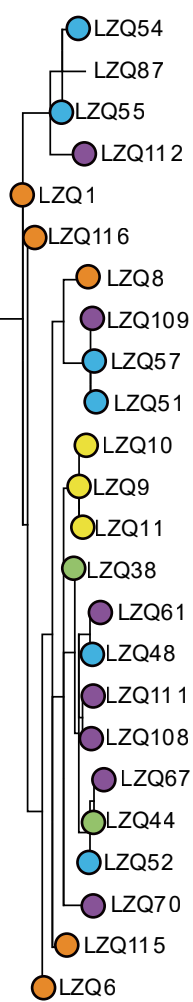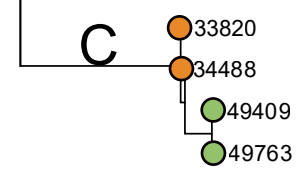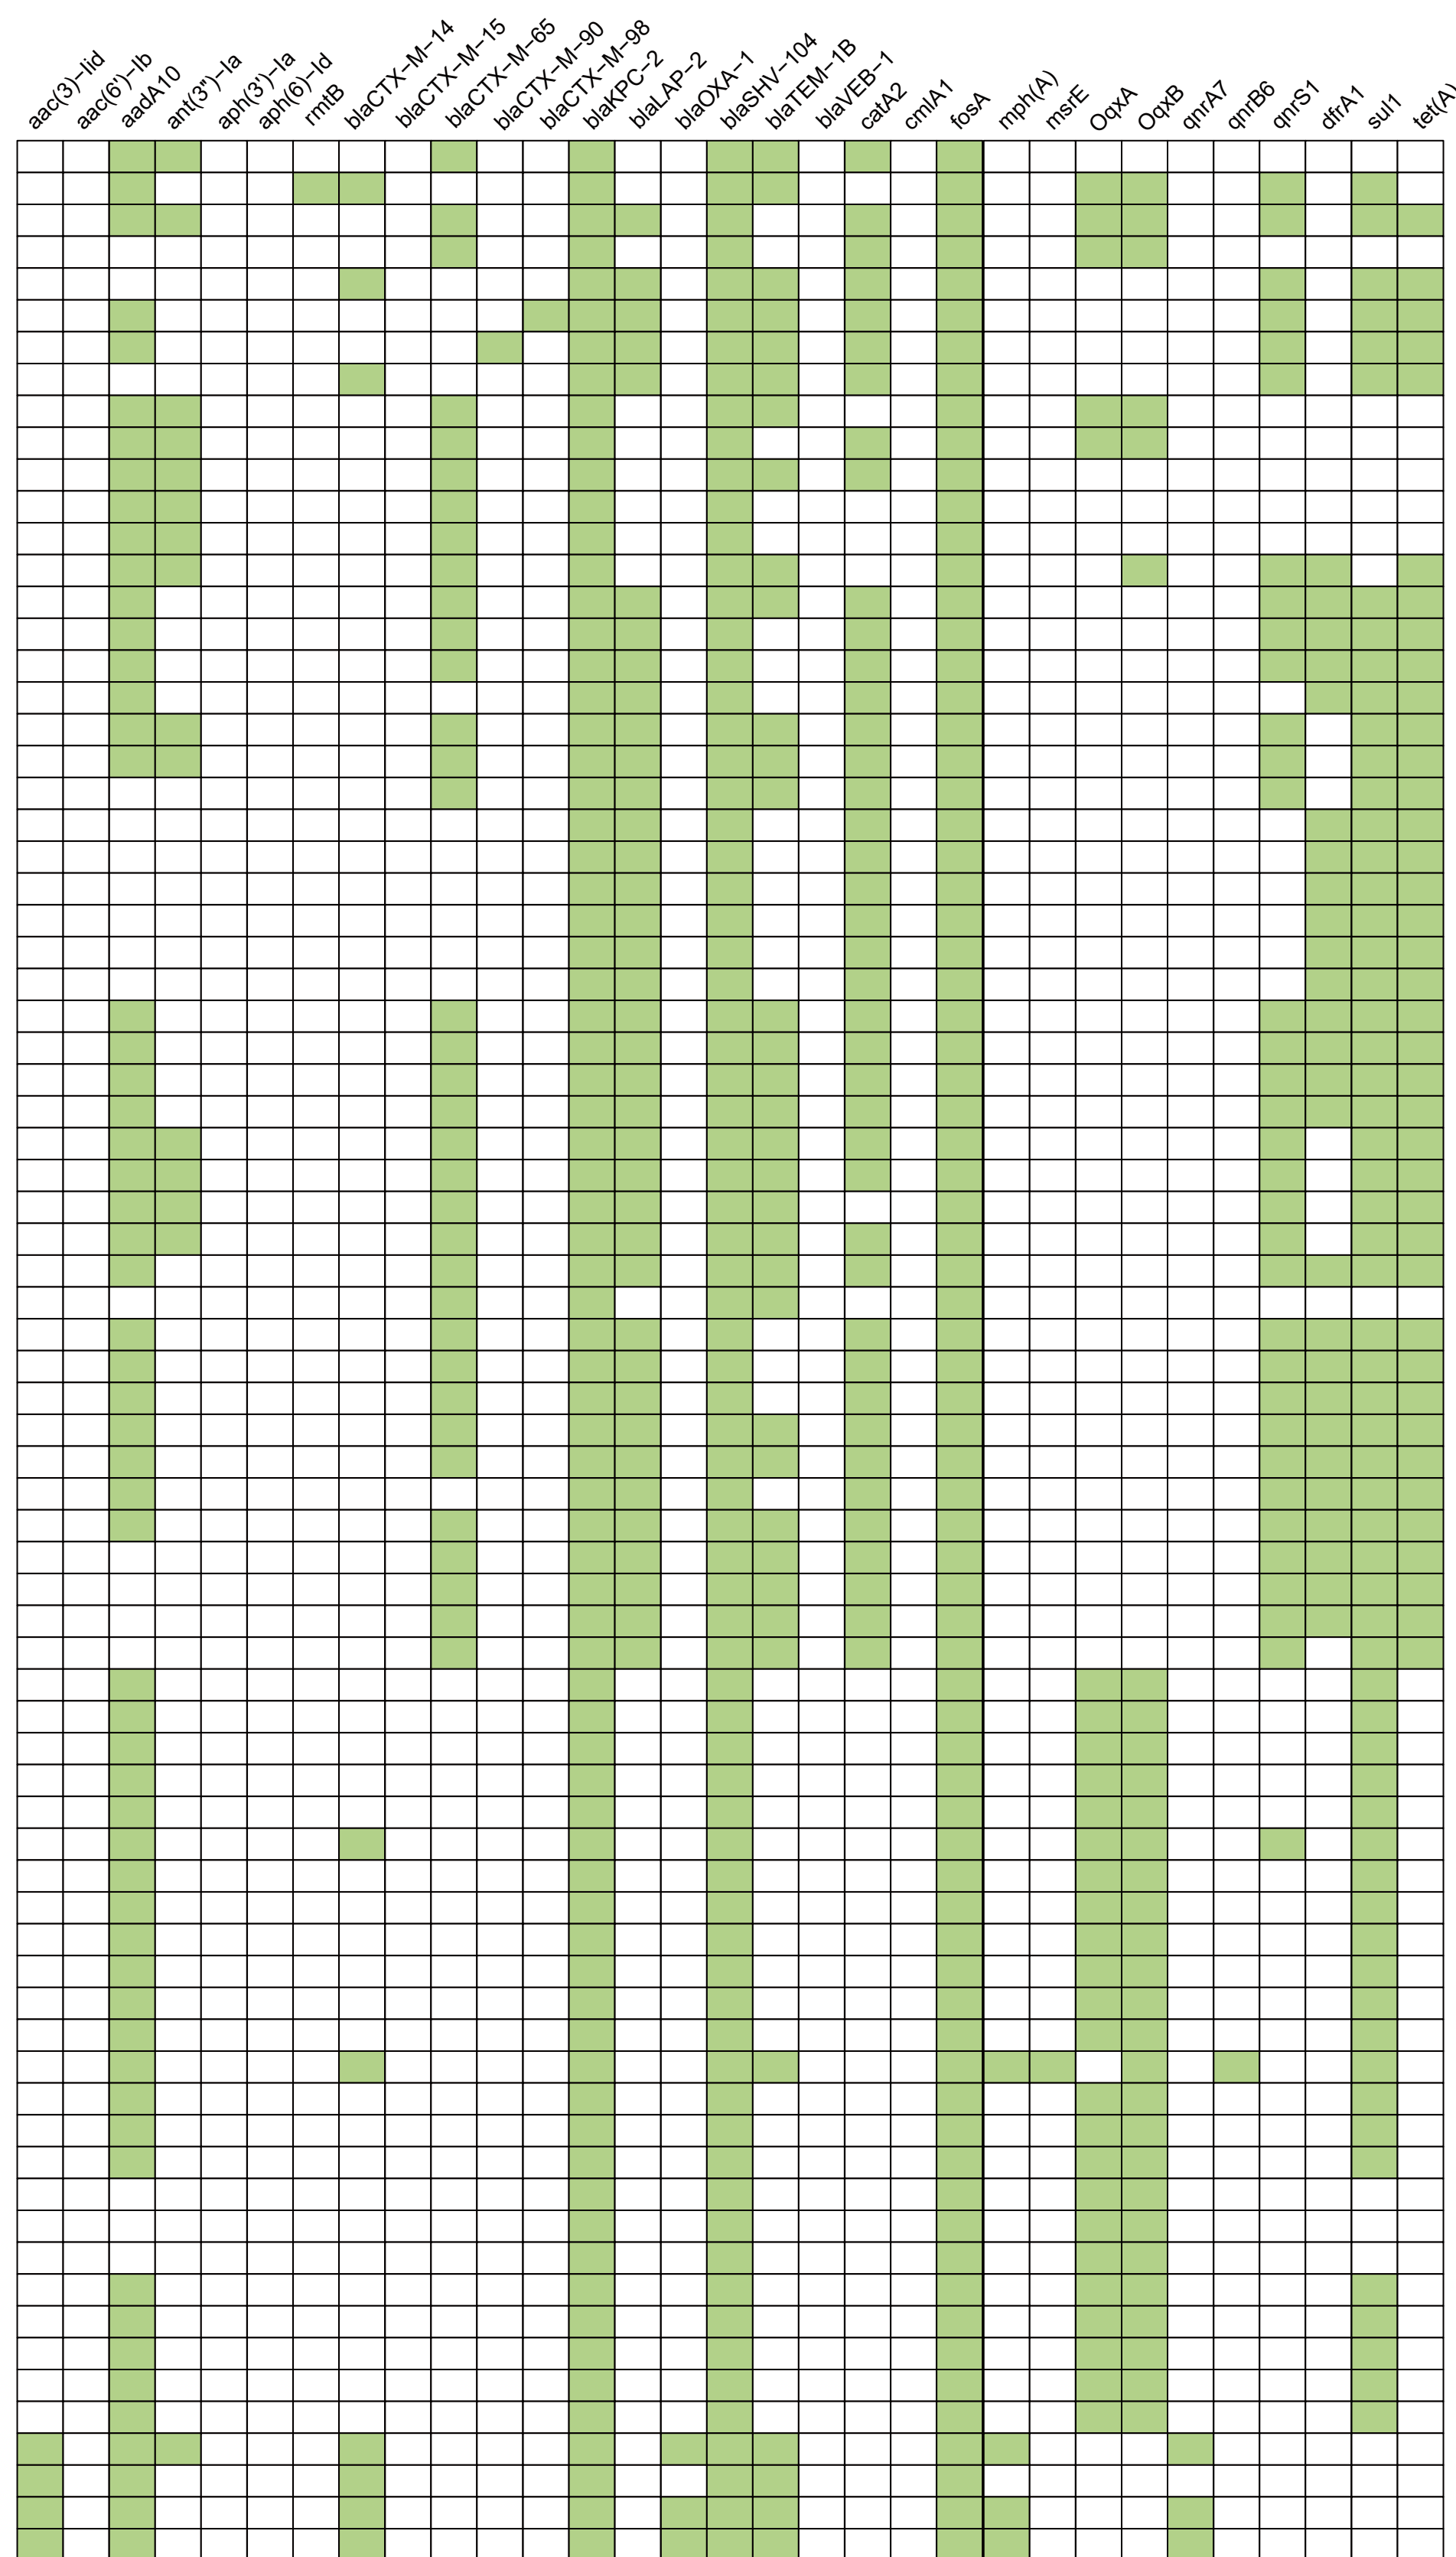

**Resistance genes**

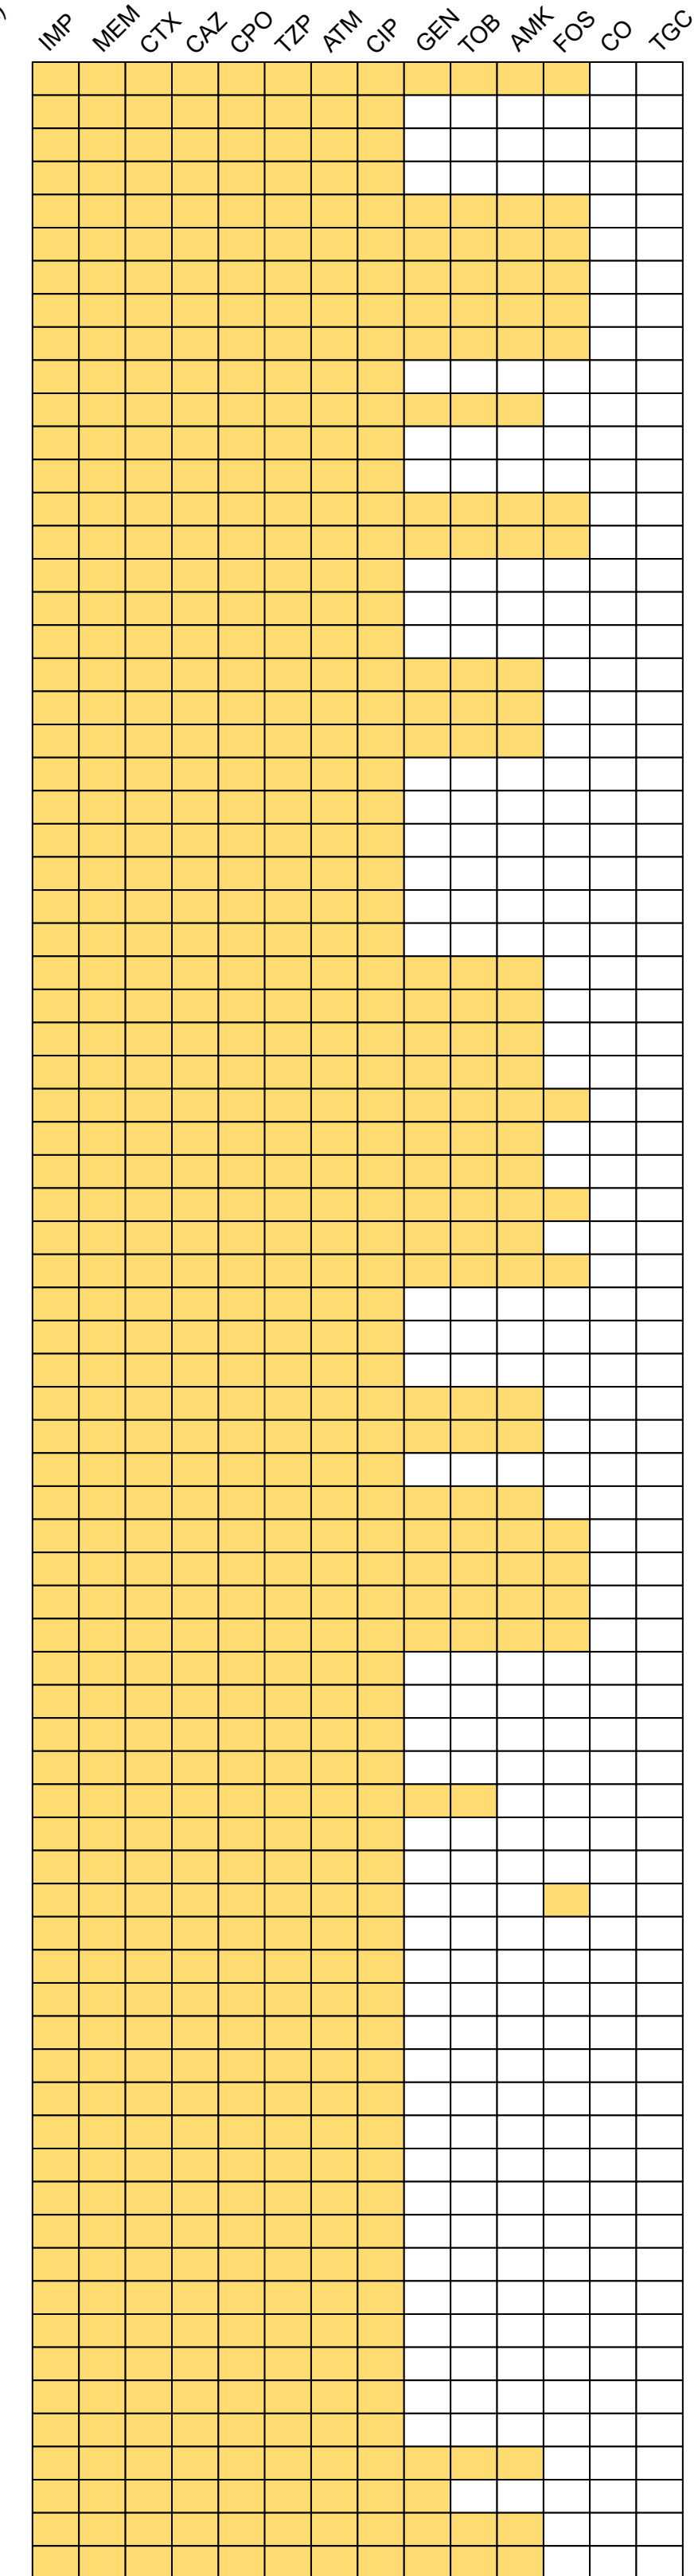

**Resistant phenotype**

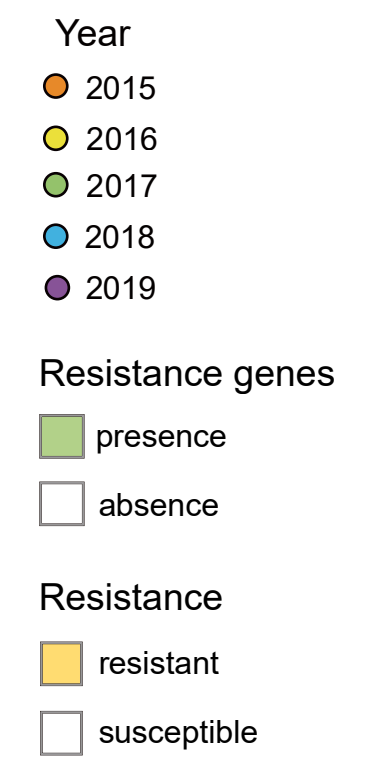

Supplement: 134_2022_6881_MOESM1_ESM.pdf [file 134_2022_6881_MOESM1_ESM.pdf]

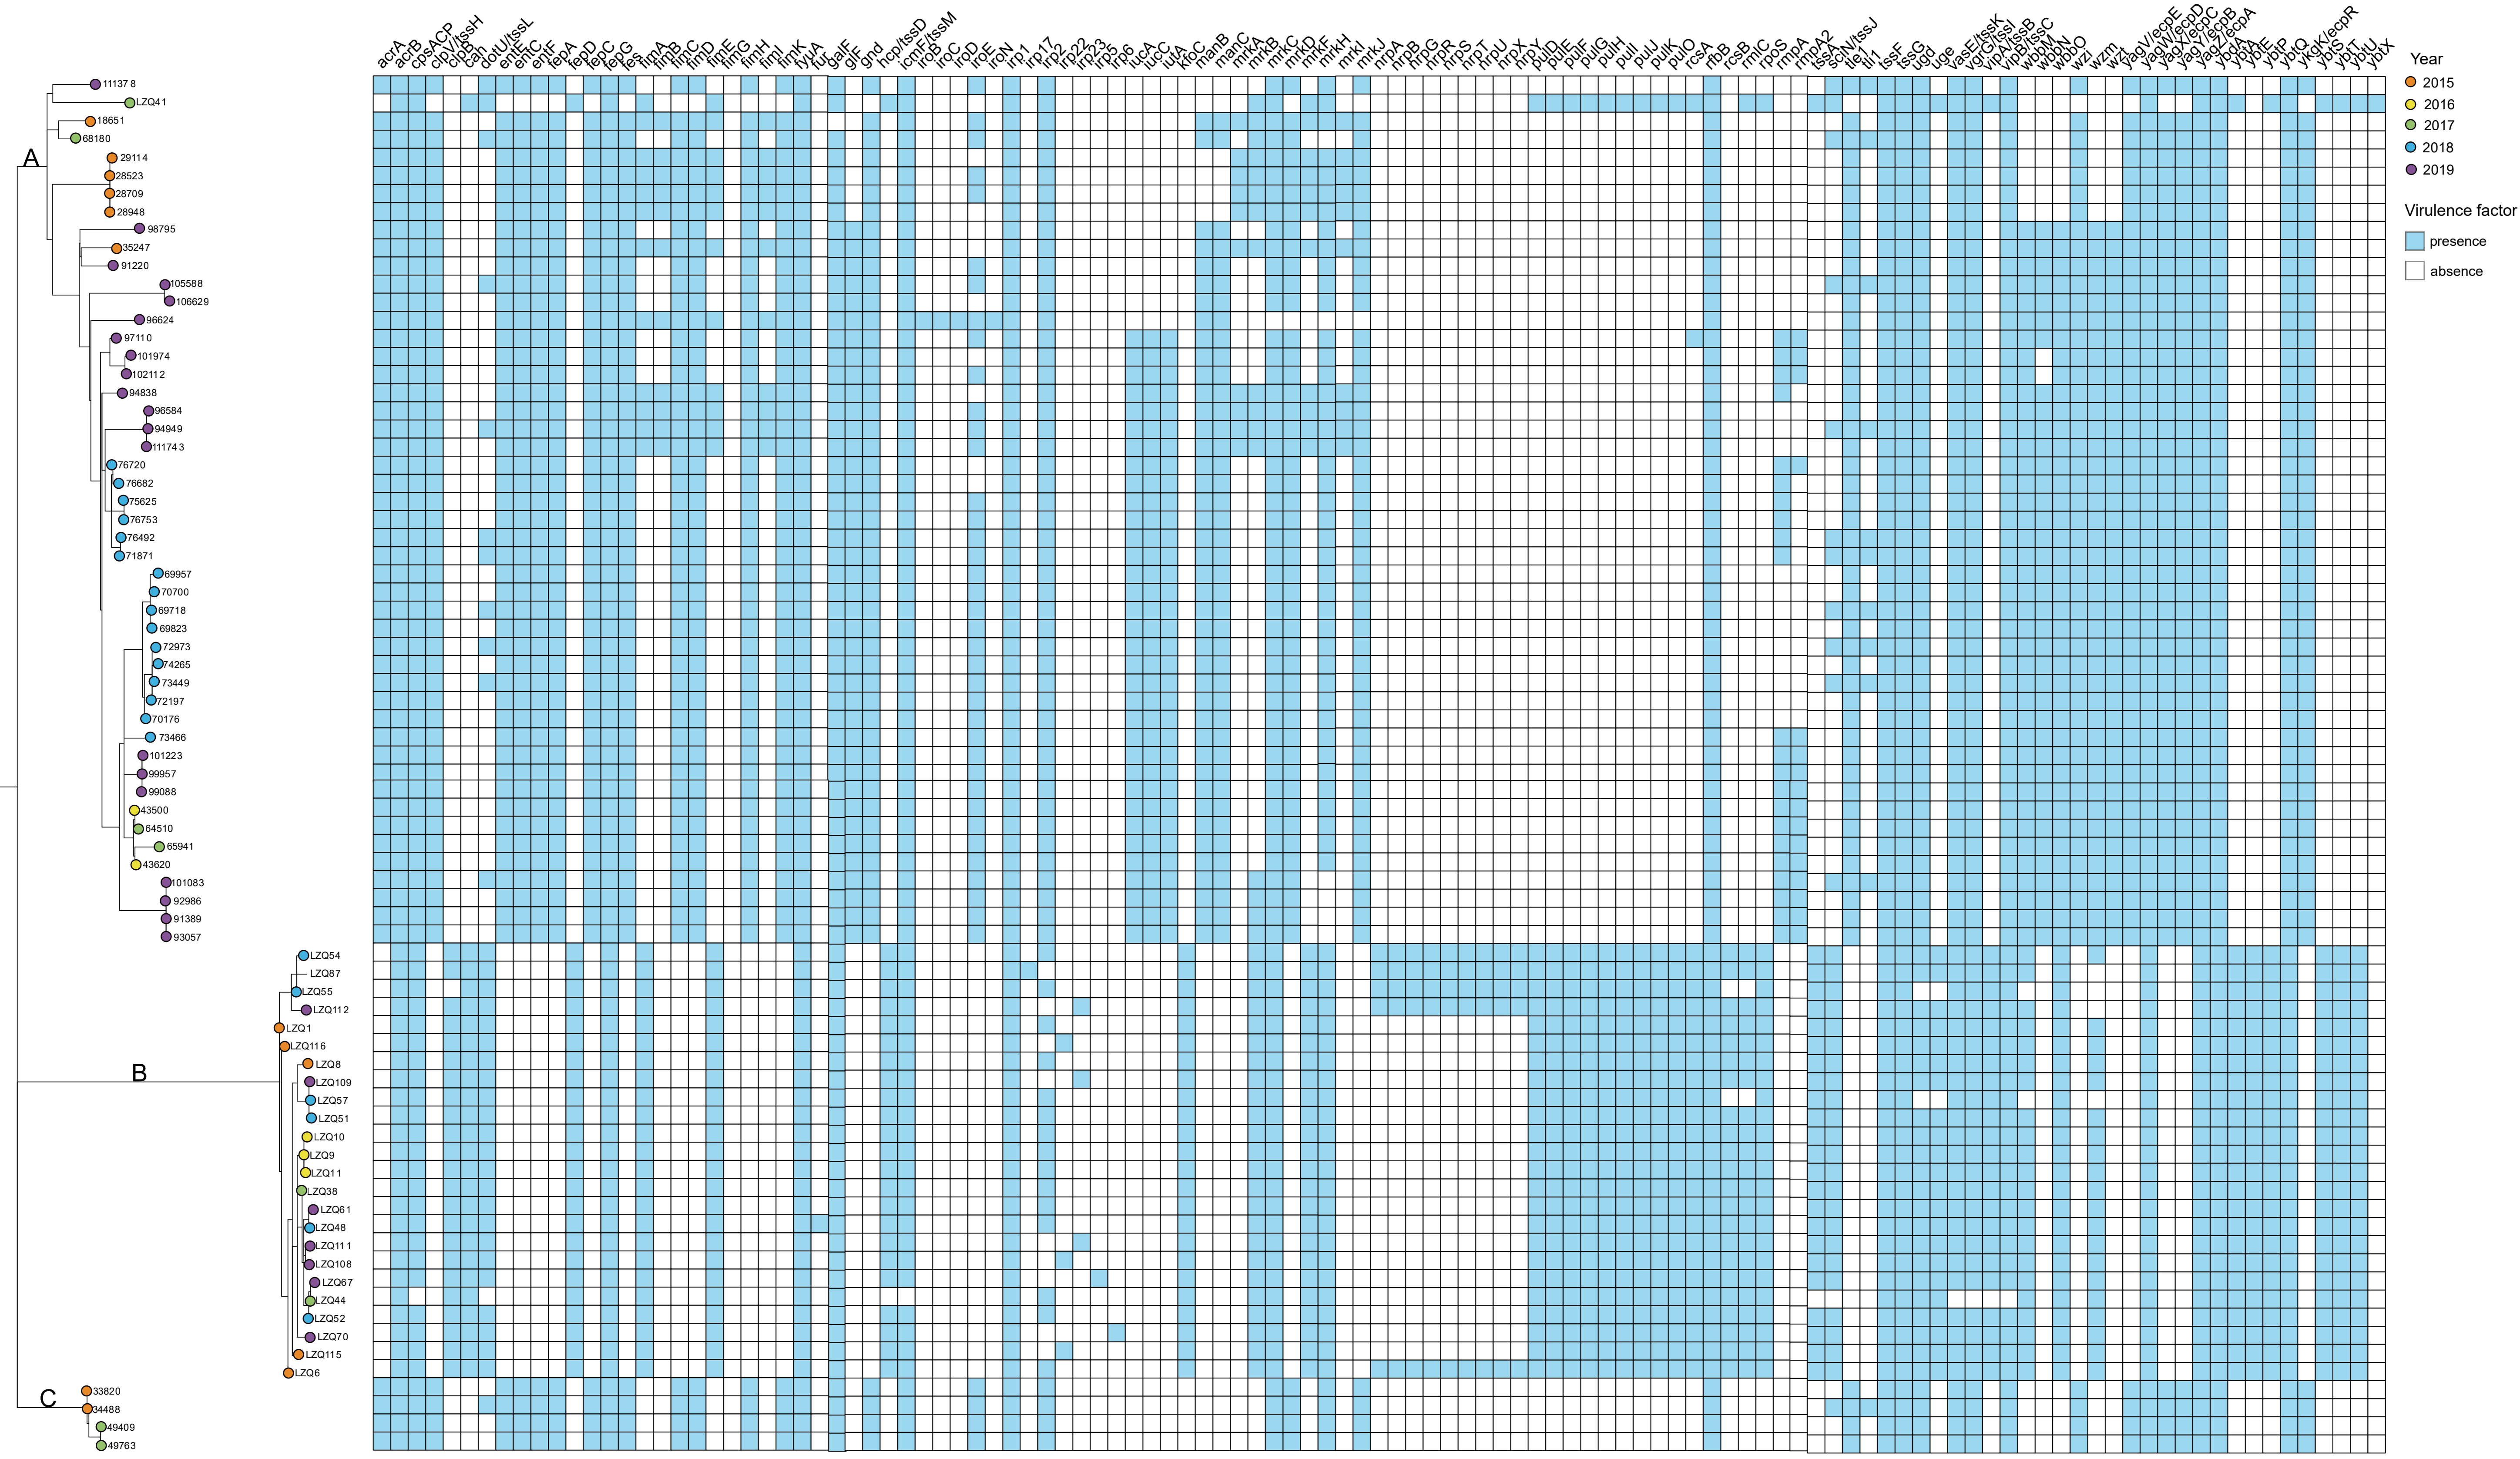

A

B

C

Supplement: 134_2022_6881_MOESM2_ESM.pdf [file 134_2022_6881_MOESM2_ESM.pdf]
